# Supplementary material
Source: PubMed Central journal article supplement (PMC4456226)

### Supplemental Digital Content

**Supplemental Figure 1. A shift in plasma metabolomic profiles in HF and after resynchronization therapy (CRT). A, A three way comparison of plasma metabolomic profiles of control, HF pre-CRT and HF post CRT groups by partial least squares discriminant analysis (PLS-DA). B, An integral panel of the most important metabolites in group distinction by variable importance in the projection (VIP).**

**Supplemental Figure 2.** Transitions in metabolomic matrix in control patients, and cardiac resynchronization therapy (CRT) patients. The red color in this heat map indicates an increased metabolite level, and green indicates a decreased metabolite level. The CRT group has a distinct cluster (#1) with decreased metabolite levels and another cluster (#2 and below) with increased metabolite levels. Glutamic acid and glutamic acid (dehydrated) are shown as two separate entries.

Supplemental Table 1. Plasma Metabolite Levels Before and After CRT\*

| Metabolite            | Control |   |      | HF pre-CRT<br>(N=24) |   |      | HF post-CRT<br>(N=18) |   |      | HF pre-CRT –<br>Control<br>P Value | HF post-CRT –<br>Control<br>P Value | HF pre-CRT-<br>post-CRT<br>P Value |
|-----------------------|---------|---|------|----------------------|---|------|-----------------------|---|------|------------------------------------|-------------------------------------|------------------------------------|
| 2-HB                  | 1.44    | ± | 0.35 | 1.14                 | ± | 0.11 | 0.60                  | ± | 0.12 | .29                                | .010                                | .002                               |
| 2-hydroxypyridine     | 0.82    | ± | 0.10 | 0.89                 | ± | 0.07 | 1.23                  | ± | 0.11 | .63                                | .020                                | .009                               |
| 3-AIB                 | 0.78    | ± | 0.13 | 0.89                 | ± | 0.08 | 1.25                  | ± | 0.12 | .51                                | .023                                | .01                                |
| 3-HB                  | 0.85    | ± | 0.09 | 0.93                 | ± | 0.06 | 1.17                  | ± | 0.10 | .51                                | .052                                | .04                                |
| Acetate               | 0.71    | ± | 0.18 | 0.78                 | ± | 0.12 | 1.43                  | ± | 0.19 | .76                                | .023                                | .006                               |
| Acetoacetate          | 0.80    | ± | 0.12 | 0.90                 | ± | 0.10 | 1.23                  | ± | 0.13 | .55                                | .040                                | .04                                |
| Acetone               | 0.80    | ± | 0.23 | 0.96                 | ± | 0.09 | 1.15                  | ± | 0.12 | .42                                | .14                                 | .22                                |
| Acetylsalicylic acid  | 0.13    | ± | 0.07 | 1.24                 | ± | 0.54 | 1.15                  | ± | 0.45 | .19                                | .11                                 | .90                                |
| Alanine               | 0.92    | ± | 0.16 | 0.78                 | ± | 0.10 | 1.32                  | ± | 0.16 | .49                                | .12                                 | .006                               |
| Allo-inositol         | 0.51    | ± | 0.09 | 0.97                 | ± | 0.19 | 1.29                  | ± | 0.21 | .13                                | .015                                | .26                                |
| Arabitol              | 0.53    | ± | 0.11 | 0.98                 | ± | 0.17 | 1.28                  | ± | 0.25 | .11                                | .047                                | .31                                |
| Benzoate              | 1.49    | ± | 0.47 | 1.18                 | ± | 0.33 | 0.51                  | ± | 0.07 | .61                                | .010                                | .09                                |
| Beta-alanine          | 0.95    | ± | 0.13 | 0.92                 | ± | 0.07 | 1.13                  | ± | 0.10 | .83                                | .28                                 | .08                                |
| Cholesterol           | 1.15    | ± | 0.14 | 0.90                 | ± | 0.05 | 1.05                  | ± | 0.07 | .04                                | .46                                 | .09                                |
| Citrate               | 1.08    | ± | 0.26 | 0.85                 | ± | 0.07 | 1.15                  | ± | 0.21 | .26                                | .002                                | .15                                |
| Creatine              | 0.75    | ± | 0.07 | 0.91                 | ± | 0.06 | 1.24                  | ± | 0.09 | .12                                | .001                                | .003                               |
| Creatinine            | 0.58    | ± | 0.10 | 1.13                 | ± | 0.17 | 1.06                  | ± | 0.15 | .05                                | .002                                | .79                                |
| Cysteine              | 1.26    | ± | 0.19 | 0.83                 | ± | 0.08 | 1.07                  | ± | 0.07 | .02                                | .27                                 | .04                                |
| Fumarate              | 0.60    | ± | 0.12 | 1.01                 | ± | 0.18 | 1.20                  | ± | 0.17 | .16                                | .021                                | .45                                |
| Galactinol            | 0.51    | ± | 0.12 | 0.46                 | ± | 0.08 | 1.93                  | ± | 0.47 | .75                                | .038                                | .001                               |
| Galacturonate         | 0.52    | ± | 0.17 | 1.85                 | ± | 0.48 | 0.18                  | ± | 0.00 | .09                                | .007                                | .004                               |
| Gluconate             | 0.76    | ± | 0.28 | 1.73                 | ± | 0.43 | 0.21                  | ± | 0.00 | .17                                | .009                                | .003                               |
| Glucose               | 0.91    | ± | 0.08 | 0.98                 | ± | 0.02 | 1.07                  | ± | 0.05 | .24                                | .099                                | .12                                |
| Glutamate             | 0.43    | ± | 0.08 | 1.54                 | ± | 0.14 | 0.61                  | ± | 0.09 | <.001                              | .21                                 | <.001                              |
| Glutamine             | 0.83    | ± | 0.14 | 0.81                 | ± | 0.11 | 1.33                  | ± | 0.15 | .900                               | .042                                | .007                               |
| Glycerate             | 0.62    | ± | 0.10 | 1.16                 | ± | 0.19 | 1.00                  | ± | 0.12 | .09                                | .040                                | .52                                |
| Glycerol              | 1.92    | ± | 0.41 | 0.91                 | ± | 0.14 | 0.63                  | ± | 0.09 | .005                               | .000                                | .13                                |
| Glycerol-1- phosphate | 1.01    | ± | 0.30 | 0.79                 | ± | 0.07 | 1.27                  | ± | 0.12 | .32                                | .34                                 | .001                               |
| Glycine               | 1.29    | ± | 0.22 | 0.82                 | ± | 0.05 | 1.07                  | ± | 0.12 | .007                               | .36                                 | .04                                |
| Glycolate             | 0.89    | ± | 0.07 | 0.93                 | ± | 0.07 | 1.14                  | ± | 0.08 | .75                                | .052                                | .05                                |
| Heptadecanoate        | 1.80    | ± | 0.80 | 1.18                 | ± | 0.19 | 0.35                  | ± | 0.00 | .30                                | .018                                | <.001                              |
| Iminodiacetate        | 0.94    | ± | 0.05 | 1.00                 | ± | 0.05 | 1.03                  | ± | 0.05 | .47                                | .28                                 | .69                                |
| Isoleucine            | 0.87    | ± | 0.09 | 0.90                 | ± | 0.05 | 1.19                  | ± | 0.07 | .77                                | .015                                | .001                               |
| IBTP                  | 1.10    | ± | 0.46 | 0.89                 | ± | 0.07 | 1.08                  | ± | 0.21 | .50                                | .96                                 | .37                                |
| Lactate               | 1.03    | ± | 0.25 | 0.92                 | ± | 0.08 | 1.09                  | ± | 0.10 | .60                                | .78                                 | .19                                |
| Leucine               | 0.87    | ± | 0.10 | 0.90                 | ± | 0.05 | 1.19                  | ± | 0.08 | .76                                | .026                                | .004                               |
| Linoleate             | 1.85    | ± | 0.51 | 0.94                 | ± | 0.08 | 0.63                  | ± | 0.08 | .01                                | .003                                | .009                               |
| Lysine                | 0.93    | ± | 0.07 | 0.97                 | ± | 0.12 | 1.08                  | ± | 0.16 | .86                                | .52                                 | .55                                |
| Malate                | 0.85    | ± | 0.34 | 1.59                 | ± | 0.35 | 0.34                  | ± | 0.00 | .22                                | .047                                | .003                               |

|                          |      |   |      |      |   |      |      |   |      |      |       |       |
|--------------------------|------|---|------|------|---|------|------|---|------|------|-------|-------|
| <b>Malonate</b>          | 0.65 | ± | 0.05 | 0.94 | ± | 0.13 | 1.26 | ± | 0.25 | .16  | .09   | .24   |
| <b>Mannitol</b>          | 1.13 | ± | 0.56 | 0.87 | ± | 0.27 | 1.10 | ± | 0.36 | .64  | .97   | .60   |
| <b>Melezitose</b>        | 1.47 | ± | 0.61 | 1.52 | ± | 0.50 | 0.10 | ± | 0.00 | .96  | .004  | .02   |
| <b>Methylamine</b>       | 0.61 | ± | 0.31 | 0.72 | ± | 0.21 | 1.57 | ± | 0.30 | .78  | .049  | .02   |
| <b>Methylguanidine</b>   | 1.22 | ± | 0.36 | 0.77 | ± | 0.23 | 1.17 | ± | 0.21 | .31  | .90   | .22   |
| <b>Myristate</b>         | 1.66 | ± | 0.33 | 1.14 | ± | 0.09 | 0.48 | ± | 0.05 | .05  | <.001 | <.001 |
| <b>Nicotinate</b>        | 1.41 | ± | 0.17 | 1.14 | ± | 0.12 | 0.60 | ± | 0.17 | .22  | .005  | .01   |
| <b>N-methylhistidine</b> | 0.47 | ± | 0.04 | 0.59 | ± | 0.04 | 1.80 | ± | 0.38 | .07  | .018  | .001  |
| <b>Norleucine</b>        | 0.90 | ± | 0.10 | 0.94 | ± | 0.09 | 1.12 | ± | 0.13 | .78  | .26   | .26   |
| <b>Norvaline</b>         | 1.06 | ± | 0.12 | 1.01 | ± | 0.07 | 0.96 | ± | 0.12 | .70  | .56   | .69   |
| <b>Oleate</b>            | 1.50 | ± | 0.30 | 1.18 | ± | 0.09 | 0.51 | ± | 0.08 | .20  | <.001 | <.001 |
| <b>Ornithine</b>         | 0.95 | ± | 0.12 | 0.95 | ± | 0.07 | 1.09 | ± | 0.09 | .99  | .34   | .12   |
| <b>Oxalate</b>           | 0.60 | ± | 0.11 | 0.78 | ± | 0.09 | 1.49 | ± | 0.27 | .26  | .029  | .01   |
| <b>Palmitate</b>         | 1.33 | ± | 0.19 | 1.08 | ± | 0.06 | 0.73 | ± | 0.05 | .10  | <.001 | <.001 |
| <b>Palmitoleate</b>      | 1.81 | ± | 0.51 | 1.18 | ± | 0.17 | 0.35 | ± | 0.09 | .13  | <.001 | <.001 |
| <b>Phenylalanine</b>     | 0.59 | ± | 0.09 | 0.54 | ± | 0.05 | 1.79 | ± | 0.57 | .62  | .14   | .02   |
| <b>Phosphate</b>         | 0.98 | ± | 0.11 | 0.95 | ± | 0.03 | 1.07 | ± | 0.04 | .71  | .34   | .02   |
| <b>Proline</b>           | 0.76 | ± | 0.11 | 0.89 | ± | 0.08 | 1.26 | ± | 0.09 | .33  | .002  | .004  |
| <b>Pyrophosphate</b>     | 0.31 | ± | 0.09 | 0.72 | ± | 0.26 | 1.72 | ± | 1.02 | .33  | .33   | .30   |
| <b>Pyruvate</b>          | 1.15 | ± | 0.34 | 0.98 | ± | 0.11 | 0.94 | ± | 0.16 | .56  | .54   | .82   |
| <b>Serine</b>            | 1.42 | ± | 0.15 | 0.93 | ± | 0.07 | 0.87 | ± | 0.08 | .003 | .001  | .55   |
| <b>Serotonin</b>         | 1.62 | ± | 0.18 | 1.06 | ± | 0.12 | 0.59 | ± | 0.15 | .02  | <.001 | .02   |
| <b>Stearate</b>          | 1.15 | ± | 0.12 | 1.08 | ± | 0.04 | 0.82 | ± | 0.04 | .49  | .005  | <.001 |
| <b>Succinate</b>         | 0.90 | ± | 0.33 | 0.73 | ± | 0.14 | 1.40 | ± | 0.21 | .58  | <.001 | .009  |
| <b>Sucrose</b>           | 0.06 | ± | 0.03 | 0.58 | ± | 0.39 | 2.03 | ± | 1.08 | .40  | .20   | .12   |
| <b>Tagatose</b>          | 0.46 | ± | 0.14 | 1.91 | ± | 0.67 | 0.14 | ± | 0.00 | .18  | .003  | .02   |
| <b>Threitol</b>          | 0.48 | ± | 0.08 | 1.08 | ± | 0.14 | 1.17 | ± | 0.20 | .01  | .025  | .71   |
| <b>Threonine</b>         | 1.40 | ± | 0.16 | 0.85 | ± | 0.08 | 0.98 | ± | 0.08 | .002 | .017  | .24   |
| <b>Tryptophan</b>        | 0.86 | ± | 0.23 | 1.63 | ± | 0.29 | 0.27 | ± | 0.00 | .11  | .001  | <.001 |
| <b>Tyrosine</b>          | 0.49 | ± | 0.04 | 0.50 | ± | 0.03 | 1.90 | ± | 0.41 | .85  | .021  | <.001 |
| <b>Urea</b>              | 0.72 | ± | 0.08 | 1.03 | ± | 0.09 | 1.11 | ± | 0.12 | .05  | .038  | .58   |
| <b>Urate</b>             | 0.47 | ± | 0.07 | 1.14 | ± | 0.13 | 1.11 | ± | 0.19 | .003 | .023  | .88   |
| <b>Valine</b>            | 0.93 | ± | 0.10 | 0.94 | ± | 0.05 | 1.10 | ± | 0.07 | .92  | .031  | .06   |

Abbreviations: CRT, cardiac resynchronization therapy; IBTP, isopropyl  $\beta$ -1-thiogalactopyranoside; 2-HB, 2-hydroxybutyrate; 3-AIB, 3-aminoisobutyrate; 3-HB, 3-hydroxybutyrate.

\* Values are mean $\pm$ standard error of the mean unless indicated otherwise.

**Supplemental Table 2.** Plasma Metabolite Levels Before and After CRT in Responders and Non-responders\*

| Metabolite                            | Responders   |   |      |               |   |      |         | Non-responders |   |      |                |   |      |         |
|---------------------------------------|--------------|---|------|---------------|---|------|---------|----------------|---|------|----------------|---|------|---------|
|                                       | pre-CRT(N=9) |   |      | post-CRT(N=7) |   |      | P Value | pre-CRT(N=13)  |   |      | post-CRT(N=10) |   |      | P Value |
| 2-HB                                  | 1.24         | ± | 0.60 | 0.79          | ± | 0.73 | 0.15    | 1.05           | ± | 0.44 | 0.43           | ± | 0.13 | <.001   |
| 2-hydroxypyridine                     | 0.75         | ± | 0.38 | 1.25          | ± | 0.51 | 0.02    | 1.01           | ± | 0.30 | 1.22           | ± | 0.44 | 0.19    |
| 3-AIB                                 | 0.95         | ± | 0.40 | 1.24          | ± | 0.41 | 0.13    | 0.83           | ± | 0.41 | 1.27           | ± | 0.65 | 0.06    |
| 3-HB                                  | 0.98         | ± | 0.28 | 1.14          | ± | 0.35 | 0.26    | 0.88           | ± | 0.33 | 1.20           | ± | 0.53 | 0.10    |
| Acetate                               | 0.78         | ± | 0.53 | 1.37          | ± | 0.72 | 0.05    | 0.78           | ± | 0.68 | 1.48           | ± | 0.96 | 0.05    |
| Acetoacetate                          | 0.94         | ± | 0.39 | 1.19          | ± | 0.51 | 0.23    | 0.86           | ± | 0.56 | 1.27           | ± | 0.64 | 0.12    |
| Acetone                               | 1.03         | ± | 0.40 | 1.22          | ± | 0.53 | 0.36    | 0.91           | ± | 0.50 | 1.08           | ± | 0.53 | 0.43    |
| Acetylsalicylic acid                  | 1.23         | ± | 3.03 | 0.24          | ± | 0.46 | 0.35    | 1.26           | ± | 2.37 | 1.97           | ± | 2.41 | 0.49    |
| Alanine                               | 0.80         | ± | 0.45 | 1.33          | ± | 0.55 | 0.03    | 0.77           | ± | 0.58 | 1.30           | ± | 0.82 | 0.08    |
| Allo-inositol                         | 1.04         | ± | 1.13 | 1.53          | ± | 1.11 | 0.34    | 0.92           | ± | 0.74 | 1.07           | ± | 0.68 | 0.61    |
| Arabitol                              | 1.02         | ± | 0.82 | 1.51          | ± | 1.46 | 0.35    | 0.94           | ± | 0.87 | 1.07           | ± | 0.64 | 0.70    |
| Benzoic acid                          | 1.07         | ± | 0.72 | 0.55          | ± | 0.35 | 0.05    | 1.27           | ± | 2.16 | 0.48           | ± | 0.29 | 0.26    |
| Beta- alanine                         | 0.86         | ± | 0.38 | 1.24          | ± | 0.58 | 0.10    | 0.96           | ± | 0.34 | 1.04           | ± | 0.27 | 0.55    |
| Cholesterol                           | 0.95         | ± | 0.18 | 1.16          | ± | 0.33 | 0.15    | 0.85           | ± | 0.29 | 0.95           | ± | 0.27 | 0.43    |
| Citrate                               | 0.90         | ± | 0.49 | 1.35          | ± | 0.58 | 0.08    | 0.76           | ± | 0.52 | 1.52           | ± | 0.82 | 0.01    |
| Creatine                              | 0.92         | ± | 0.22 | 1.16          | ± | 0.29 | 0.05    | 0.91           | ± | 0.33 | 1.31           | ± | 0.47 | 0.03    |
| Creatinine                            | 0.89         | ± | 0.25 | 1.20          | ± | 0.42 | 0.05    | 0.89           | ± | 0.46 | 1.39           | ± | 0.62 | 0.03    |
| Cysteine                              | 0.84         | ± | 0.40 | 1.11          | ± | 0.26 | 0.09    | 0.83           | ± | 0.41 | 1.04           | ± | 0.38 | 0.23    |
| Fumaric acid                          | 1.14         | ± | 1.11 | 1.27          | ± | 0.93 | 0.78    | 0.90           | ± | 0.65 | 1.14           | ± | 0.52 | 0.36    |
| Galactinol                            | 0.52         | ± | 0.48 | 1.79          | ± | 2.36 | 0.10    | 0.42           | ± | 0.27 | 2.06           | ± | 1.81 | <.001   |
| Galacturonic acid                     | 2.21         | ± | 2.41 | 0.18          | ± | 0.00 | 0.02    | 1.54           | ± | 2.37 | 0.18           | ± | 0.00 | 0.09    |
| Gluconic acid                         | 1.87         | ± | 2.14 | 0.21          | ± | 0.00 | 0.03    | 1.61           | ± | 2.14 | 0.21           | ± | 0.00 | 0.05    |
| Glucose                               | 0.98         | ± | 0.09 | 1.08          | ± | 0.16 | 0.07    | 0.99           | ± | 0.12 | 1.05           | ± | 0.28 | 0.48    |
| Glutamic acid                         | 1.58         | ± | 0.68 | 0.70          | ± | 0.39 | <.001   | 1.51           | ± | 0.68 | 0.54           | ± | 0.43 | <.001   |
| Glutamine                             | 0.81         | ± | 0.45 | 1.25          | ± | 0.58 | 0.07    | 0.81           | ± | 0.64 | 1.40           | ± | 0.74 | 0.06    |
| Glyceric acid                         | 1.06         | ± | 0.29 | 0.92          | ± | 0.40 | 0.38    | 1.24           | ± | 1.25 | 1.08           | ± | 0.59 | 0.71    |
| Glycerol                              | 0.85         | ± | 0.33 | 0.69          | ± | 0.48 | 0.39    | 0.95           | ± | 0.89 | 0.58           | ± | 0.35 | 0.23    |
| Glycerol -1-P                         | 0.88         | ± | 0.29 | 1.42          | ± | 0.45 | <.001   | 0.71           | ± | 0.35 | 1.13           | ± | 0.53 | 0.03    |
| Glycine                               | 0.75         | ± | 0.24 | 0.92          | ± | 0.36 | 0.22    | 0.88           | ± | 0.25 | 1.21           | ± | 0.62 | 0.10    |
| Glycolic acid                         | 0.88         | ± | 0.31 | 1.08          | ± | 0.35 | 0.18    | 0.98           | ± | 0.35 | 1.20           | ± | 0.36 | 0.15    |
| Heptadecanoic acid                    | 1.30         | ± | 1.03 | 0.35          | ± | 0.00 | 0.01    | 1.07           | ± | 0.88 | 0.35           | ± | 0.00 | 0.02    |
| Iminodiacetic acid                    | 0.96         | ± | 0.14 | 1.02          | ± | 0.21 | 0.47    | 1.03           | ± | 0.28 | 1.03           | ± | 0.23 | 0.99    |
| Isoleucine                            | 0.94         | ± | 0.17 | 1.15          | ± | 0.27 | 0.05    | 0.87           | ± | 0.28 | 1.23           | ± | 0.37 | 0.01    |
| Isopropyl beta--thiogalactopyranoside | 0.87         | ± | 0.32 | 1.07          | ± | 0.68 | 0.39    | 0.92           | ± | 0.34 | 1.09           | ± | 1.16 | 0.61    |
| Lactate                               | 0.98         | ± | 0.42 | 1.21          | ± | 0.44 | 0.24    | 0.87           | ± | 0.42 | 0.98           | ± | 0.43 | 0.54    |
| Leucine                               | 0.95         | ± | 0.19 | 1.15          | ± | 0.30 | 0.08    | 0.87           | ± | 0.30 | 1.22           | ± | 0.42 | 0.03    |
| Linoleic acid                         | 1.06         | ± | 0.49 | 0.69          | ± | 0.47 | 0.11    | 0.84           | ± | 0.26 | 0.56           | ± | 0.22 | 0.01    |
| Lysine                                | 0.97         | ± | 0.44 | 1.15          | ± | 0.65 | 0.47    | 0.96           | ± | 0.68 | 1.02           | ± | 0.76 | 0.85    |

|                   |      |   |      |      |   |      |       |      |   |      |      |   |      |       |
|-------------------|------|---|------|------|---|------|-------|------|---|------|------|---|------|-------|
| Malic acid        | 1.38 | ± | 1.60 | 0.34 | ± | 0.00 | 0.07  | 1.76 | ± | 1.89 | 0.34 | ± | 0.00 | 0.03  |
| Malonate          | 1.07 | ± | 0.89 | 1.22 | ± | 1.15 | 0.75  | 0.83 | ± | 0.29 | 1.29 | ± | 1.06 | 0.15  |
| Mannitol          | 1.01 | ± | 1.52 | 0.70 | ± | 0.98 | 0.61  | 0.75 | ± | 1.17 | 1.46 | ± | 1.94 | 0.29  |
| Melezitose        | 1.97 | ± | 2.89 | 0.10 | ± | 0.00 | 0.07  | 1.14 | ± | 2.06 | 0.10 | ± | 0.00 | 0.13  |
| Methylamine       | 0.79 | ± | 0.99 | 1.43 | ± | 1.13 | 0.19  | 0.65 | ± | 1.13 | 1.68 | ± | 1.47 | 0.07  |
| Methylguanidine   | 0.75 | ± | 0.81 | 1.14 | ± | 0.85 | 0.30  | 0.80 | ± | 1.37 | 1.19 | ± | 1.01 | 0.45  |
| Myristic acid     | 1.05 | ± | 0.42 | 0.49 | ± | 0.21 | <.001 | 1.21 | ± | 0.48 | 0.48 | ± | 0.26 | <.001 |
| Nicotinic acid    | 1.15 | ± | 0.50 | 0.46 | ± | 0.53 | 0.01  | 1.14 | ± | 0.66 | 0.72 | ± | 0.90 | 0.21  |
| N-methylhistidine | 0.54 | ± | 0.14 | 1.37 | ± | 1.18 | 0.03  | 0.63 | ± | 0.22 | 2.18 | ± | 1.98 | 0.01  |
| Norleucine        | 1.07 | ± | 0.54 | 1.32 | ± | 0.76 | 0.41  | 0.84 | ± | 0.35 | 0.95 | ± | 0.28 | 0.41  |
| Norvaline         | 1.10 | ± | 0.36 | 1.16 | ± | 0.59 | 0.81  | 0.93 | ± | 0.36 | 0.78 | ± | 0.35 | 0.32  |
| Oleic acid        | 1.25 | ± | 0.45 | 0.56 | ± | 0.36 | 0.00  | 1.12 | ± | 0.48 | 0.46 | ± | 0.31 | 0.00  |
| Ornithine         | 0.93 | ± | 0.23 | 1.19 | ± | 0.28 | 0.03  | 0.96 | ± | 0.39 | 1.01 | ± | 0.45 | 0.80  |
| Oxalic acid       | 0.69 | ± | 0.50 | 1.44 | ± | 0.91 | 0.03  | 0.86 | ± | 0.37 | 1.53 | ± | 1.43 | 0.12  |
| Palmitic acid     | 1.13 | ± | 0.29 | 0.76 | ± | 0.26 | 0.01  | 1.03 | ± | 0.27 | 0.70 | ± | 0.18 | <.001 |
| Palmitoleic acid  | 1.34 | ± | 0.69 | 0.38 | ± | 0.41 | <.001 | 1.04 | ± | 0.93 | 0.32 | ± | 0.39 | 0.03  |
| Phenylalanine     | 0.62 | ± | 0.19 | 1.30 | ± | 1.18 | 0.08  | 0.47 | ± | 0.31 | 2.24 | ± | 3.25 | 0.06  |
| Phosphoric acid   | 0.92 | ± | 0.20 | 1.08 | ± | 0.16 | 0.05  | 0.98 | ± | 0.13 | 1.06 | ± | 0.20 | 0.22  |
| Porphine          | 0.72 | ± | 0.26 | 0.91 | ± | 0.37 | 0.18  | 1.04 | ± | 0.36 | 1.61 | ± | 0.58 | 0.01  |
| Proline           | 0.90 | ± | 0.38 | 1.19 | ± | 0.33 | 0.09  | 0.89 | ± | 0.41 | 1.32 | ± | 0.45 | 0.02  |
| Pyrophosphate     | 1.07 | ± | 1.82 | 1.47 | ± | 4.13 | 0.77  | 0.42 | ± | 0.45 | 1.94 | ± | 4.91 | 0.28  |
| Pyruvic acid      | 1.12 | ± | 0.64 | 1.21 | ± | 0.76 | 0.79  | 0.87 | ± | 0.44 | 0.70 | ± | 0.56 | 0.44  |
| Serine            | 1.03 | ± | 0.47 | 0.93 | ± | 0.34 | 0.58  | 0.85 | ± | 0.24 | 0.81 | ± | 0.35 | 0.78  |
| Serotonin         | 1.17 | ± | 0.56 | 0.66 | ± | 0.73 | 0.09  | 0.97 | ± | 0.63 | 0.54 | ± | 0.60 | 0.11  |
| Stearic acid      | 1.08 | ± | 0.20 | 0.85 | ± | 0.21 | 0.02  | 1.08 | ± | 0.17 | 0.79 | ± | 0.17 | 0.00  |
| Succinate         | 0.68 | ± | 0.60 | 1.30 | ± | 0.78 | 0.05  | 0.77 | ± | 0.74 | 1.49 | ± | 1.07 | 0.07  |
| Sucrose           | 0.94 | ± | 2.78 | 3.75 | ± | 6.57 | 0.21  | 0.27 | ± | 0.54 | 0.49 | ± | 0.89 | 0.49  |
| Tagatose          | 1.26 | ± | 1.38 | 0.14 | ± | 0.00 | 0.03  | 2.45 | ± | 4.26 | 0.14 | ± | 0.00 | 0.10  |
| Threitol          | 1.08 | ± | 0.59 | 1.38 | ± | 1.16 | 0.46  | 1.08 | ± | 0.80 | 0.98 | ± | 0.56 | 0.74  |
| Threonine         | 0.84 | ± | 0.38 | 1.02 | ± | 0.31 | 0.27  | 0.86 | ± | 0.38 | 0.94 | ± | 0.40 | 0.60  |
| Tryptophan        | 1.59 | ± | 1.36 | 0.27 | ± | 0.00 | 0.01  | 1.67 | ± | 1.50 | 0.27 | ± | 0.00 | 0.01  |
| Tyrosine          | 0.50 | ± | 0.12 | 1.42 | ± | 1.32 | 0.03  | 0.50 | ± | 0.16 | 2.34 | ± | 2.13 | 0.01  |
| Urea              | 1.07 | ± | 0.42 | 1.14 | ± | 0.59 | 0.76  | 0.99 | ± | 0.48 | 1.08 | ± | 0.50 | 0.65  |
| Uric acid         | 1.21 | ± | 0.51 | 1.37 | ± | 1.04 | 0.68  | 1.07 | ± | 0.73 | 0.87 | ± | 0.50 | 0.46  |
| Valine            | 0.94 | ± | 0.24 | 1.18 | ± | 0.32 | 0.07  | 0.85 | ± | 0.35 | 1.24 | ± | 0.46 | 0.03  |

Abbreviations: CRT, cardiac resynchronization therapy; IBTP, isopropyl  $\beta$ -1-thiogalactopyranoside; 2-HB, 2-hydroxybutyrate; 3-AIB, 3-aminoisobutyrate; 3-HB, 3-hydroxybutyrate.

\* Values are mean $\pm$ standard error of the mean unless indicated otherwise.

**Supplemental Table 3.** Changes (delta) in Plasma Metabolite Levels Before and After CRT in Responders and Nonresponders\*

| Metabolite                            | Responders post-CRT- pre-CRT (N=7) |   |      | Nonresponders post-CRT- pre-CRT (N=10) |   |      | P Value |
|---------------------------------------|------------------------------------|---|------|----------------------------------------|---|------|---------|
|                                       |                                    | ± |      |                                        | ± |      |         |
| 2-HB                                  | -0.62                              | ± | 0.93 | -0.62                                  | ± | 0.39 | 0.98    |
| 2-hydroxypyridine                     | 0.45                               | ± | 0.61 | 0.20                                   | ± | 0.43 | 0.33    |
| 3-AIB                                 | 0.27                               | ± | 0.64 | 0.37                                   | ± | 0.60 | 0.74    |
| 3-HB                                  | 0.13                               | ± | 0.49 | 0.24                                   | ± | 0.42 | 0.61    |
| Acetate                               | 0.44                               | ± | 0.95 | 0.54                                   | ± | 1.11 | 0.84    |
| Acetoacetate                          | 0.13                               | ± | 0.58 | 0.27                                   | ± | 0.78 | 0.68    |
| Acetone                               | 0.14                               | ± | 0.71 | 0.16                                   | ± | 0.43 | 0.94    |
| Acetylsalicylic acid                  | -1.18                              | ± | 3.70 | 0.45                                   | ± | 3.02 | 0.32    |
| Alanine                               | 0.44                               | ± | 0.78 | 0.46                                   | ± | 0.96 | 0.96    |
| Allo-inositol                         | 0.44                               | ± | 0.73 | 0.10                                   | ± | 0.51 | 0.26    |
| Arabitol                              | 0.46                               | ± | 0.98 | 0.05                                   | ± | 0.57 | 0.28    |
| Benzoic acid                          | -0.62                              | ± | 0.69 | -1.00                                  | ± | 2.59 | 0.70    |
| Beta- alanine                         | 0.31                               | ± | 0.66 | 0.08                                   | ± | 0.56 | 0.42    |
| Cholesterol                           | 0.15                               | ± | 0.18 | 0.09                                   | ± | 0.14 | 0.43    |
| Citrate                               | 0.43                               | ± | 0.67 | 0.61                                   | ± | 0.78 | 0.62    |
| Creatine                              | 0.18                               | ± | 0.30 | 0.29                                   | ± | 0.50 | 0.57    |
| Creatinine                            | 0.25                               | ± | 0.43 | 0.36                                   | ± | 0.70 | 0.69    |
| Cysteine                              | 0.29                               | ± | 0.39 | 0.15                                   | ± | 0.56 | 0.57    |
| Fumaric acid                          | -0.04                              | ± | 1.17 | 0.14                                   | ± | 0.30 | 0.64    |
| Galactinol                            | 1.49                               | ± | 2.52 | 1.63                                   | ± | 1.84 | 0.90    |
| Galacturonic acid                     | -2.40                              | ± | 2.73 | -1.45                                  | ± | 2.59 | 0.46    |
| Gluconic acid                         | -2.02                              | ± | 2.38 | -1.41                                  | ± | 2.40 | 0.60    |
| Glucose                               | 0.08                               | ± | 0.09 | 0.05                                   | ± | 0.23 | 0.78    |
| Glutamic acid                         | -0.80                              | ± | 0.73 | -1.06                                  | ± | 0.66 | 0.44    |
| Glutamine                             | 0.30                               | ± | 0.70 | 0.45                                   | ± | 0.94 | 0.71    |
| Glyceric acid                         | -0.10                              | ± | 0.33 | -0.35                                  | ± | 1.22 | 0.58    |
| Glycerol                              | -0.22                              | ± | 0.45 | -0.50                                  | ± | 0.75 | 0.37    |
| Glycerol -1-P                         | 0.38                               | ± | 0.43 | 0.47                                   | ± | 0.41 | 0.67    |
| Glycine                               | 0.21                               | ± | 0.17 | 0.32                                   | ± | 0.48 | 0.56    |
| Glycolic acid                         | 0.36                               | ± | 0.42 | 0.26                                   | ± | 0.48 | 0.65    |
| Heptadecanoic acid                    | -1.05                              | ± | 1.04 | -0.76                                  | ± | 0.96 | 0.55    |
| Iminodiacetic acid                    | 0.04                               | ± | 0.22 | -0.06                                  | ± | 0.30 | 0.41    |
| Isoleucine                            | 0.18                               | ± | 0.37 | 0.31                                   | ± | 0.38 | 0.47    |
| Isopropyl beta--thiogalactopyranoside | -0.03                              | ± | 0.25 | 0.25                                   | ± | 1.08 | 0.49    |
| Lactate                               | 0.18                               | ± | 0.56 | 0.14                                   | ± | 0.40 | 0.88    |
| Leucine                               | 0.18                               | ± | 0.41 | 0.30                                   | ± | 0.41 | 0.55    |
| Linoleic acid                         | -0.46                              | ± | 0.29 | -0.33                                  | ± | 0.22 | 0.29    |

|                   |       |   |      |       |   |      |        |
|-------------------|-------|---|------|-------|---|------|--------|
| Lysine            | 0.24  | ± | 0.63 | 0.10  | ± | 1.08 | 0.74   |
| Malic acid        | -1.18 | ± | 1.79 | -1.44 | ± | 2.08 | 0.78   |
| Malonate          | 0.03  | ± | 1.30 | 0.46  | ± | 1.04 | 0.44   |
| Mannitol          | -0.48 | ± | 2.13 | 0.65  | ± | 2.23 | 0.29   |
| Melezitose        | -2.08 | ± | 3.29 | -1.07 | ± | 2.25 | 0.45   |
| Methylamine       | 0.43  | ± | 1.82 | 0.84  | ± | 1.72 | 0.63   |
| Methylguanidine   | 0.19  | ± | 1.37 | 0.16  | ± | 1.94 | 0.97   |
| Myristic acid     | -0.67 | ± | 0.52 | -0.87 | ± | 0.55 | 0.46   |
| Nicotinic acid    | -0.70 | ± | 0.58 | -0.40 | ± | 1.46 | 0.59   |
| N-methylhistidine | 0.88  | ± | 1.20 | 1.54  | ± | 1.95 | 0.42   |
| Norleucine        | 0.47  | ± | 0.74 | 0.10  | ± | 0.47 | 0.21   |
| Norvaline         | 0.14  | ± | 0.65 | -0.13 | ± | 0.24 | 0.25   |
| Oleic acid        | -0.84 | ± | 0.44 | -0.77 | ± | 0.42 | 0.72   |
| Ornithine         | 0.37  | ± | 0.32 | -0.06 | ± | 0.46 | 0.04** |
| Oxalic acid       | 0.76  | ± | 0.86 | 0.70  | ± | 1.37 | 0.91   |
| Palmitic acid     | -0.48 | ± | 0.33 | -0.39 | ± | 0.24 | 0.47   |
| Palmitoleic acid  | -1.20 | ± | 0.72 | -0.91 | ± | 0.86 | 0.46   |
| Phenylalanine     | 0.62  | ± | 1.27 | 1.69  | ± | 3.15 | 0.38   |
| Phosphoric acid   | 0.22  | ± | 0.10 | 0.09  | ± | 0.22 | 0.13   |
| Porphine          | 0.10  | ± | 0.46 | 0.63  | ± | 0.47 | 0.03** |
| Proline           | 0.47  | ± | 0.49 | 0.35  | ± | 0.48 | 0.61   |
| Pyrophosphate     | 0.29  | ± | 5.23 | 1.47  | ± | 5.10 | 0.64   |
| Pyruvic acid      | -0.02 | ± | 0.53 | -0.09 | ± | 0.59 | 0.79   |
| Serine            | 0.07  | ± | 0.32 | -0.08 | ± | 0.29 | 0.30   |
| Serotonin         | -0.30 | ± | 0.88 | -0.48 | ± | 1.15 | 0.72   |
| Stearic acid      | -0.28 | ± | 0.35 | -0.31 | ± | 0.17 | 0.76   |
| Succinate         | 0.42  | ± | 0.95 | 0.56  | ± | 1.24 | 0.80   |
| Sucrose           | 2.93  | ± | 6.55 | 0.16  | ± | 1.17 | 0.21   |
| Tagatose          | -0.97 | ± | 1.07 | -2.25 | ± | 4.80 | 0.47   |
| Threitol          | 0.29  | ± | 0.80 | -0.20 | ± | 0.54 | 0.14   |
| Threonine         | 0.32  | ± | 0.29 | 0.03  | ± | 0.34 | 0.08   |
| Tryptophan        | -1.01 | ± | 1.01 | -1.45 | ± | 1.66 | 0.52   |
| Tyrosine          | 1.02  | ± | 1.30 | 1.85  | ± | 2.16 | 0.36   |
| Urea              | 0.06  | ± | 0.36 | 0.04  | ± | 0.26 | 0.90   |
| Uric acid         | 0.23  | ± | 0.88 | -0.32 | ± | 0.43 | 0.10   |
| Valine            | 0.22  | ± | 0.47 | 0.34  | ± | 0.49 | 0.60   |

Abbreviations: CRT, cardiac resynchronization therapy; IBTP, isopropyl  $\beta$ -1-thiogalactopyranoside; 2-HB, 2-hydroxybutyrate; 3-AIB, 3-aminoisobutyrate; 3-HB, 3-hydroxybutyrate.

\* Values are mean $\pm$ standard error of the mean unless indicated otherwise.

\*\*  $p$  Value <.05.

Figure 1S

**A** Discrimination of metabolomic profiles

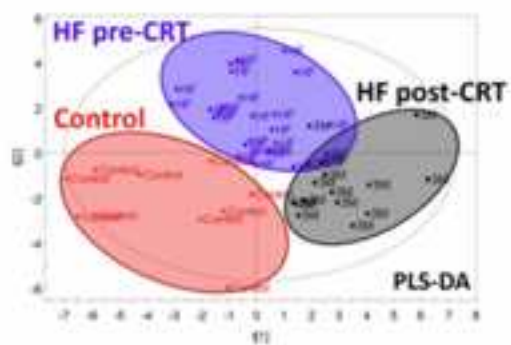

**B** Most important metabolites in group distinction

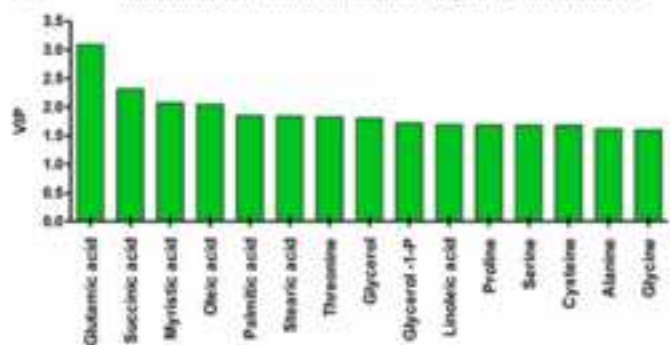



Figure 2S

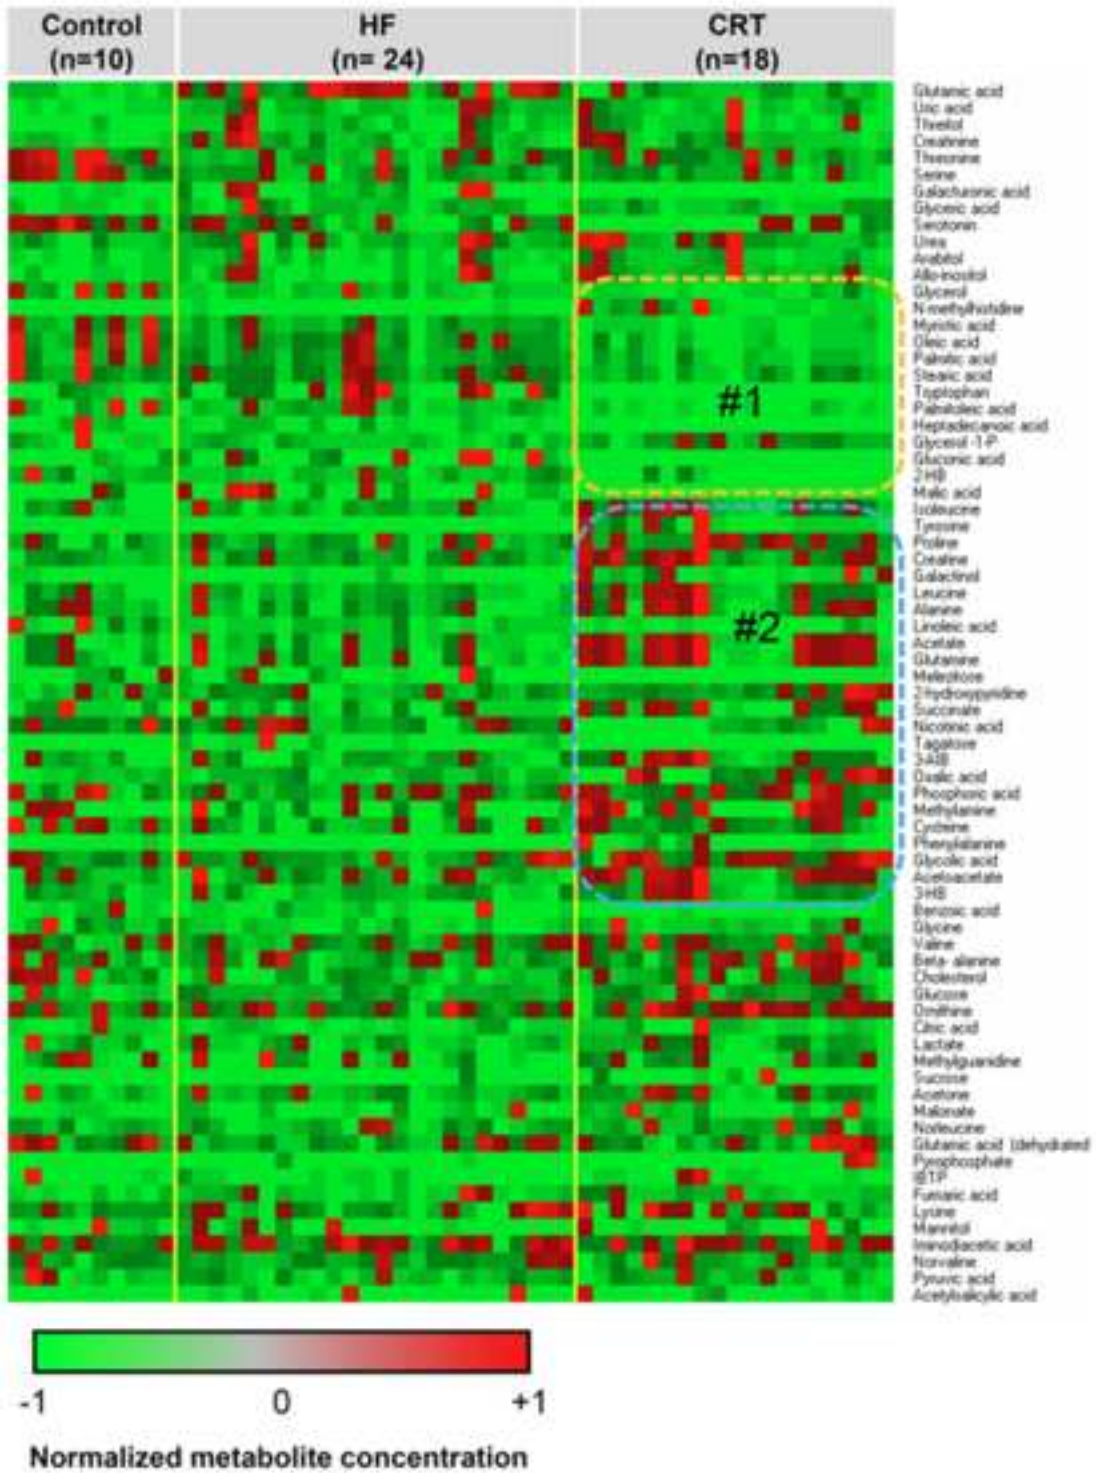

Supplement: NIHMS689960-supplement-01.pdf [file NIHMS689960-supplement-01.pdf]
